# Supplementary material for: Effects of total sleep deprivation on divided attention performance
Source: PLoS One. 2017 Nov 22;12(11):e0187098. doi: 10.1371/journal.pone.0187098 (PMC5699793; doi:10.1371/journal.pone.0187098)
Supplement: S1 Dataset — (XLSX) [file pone.0187098.s001.xlsx]

## Sheet: Dataset Divided Attention
		Auditory Go/No-Go task			Auditory Go/No-Go task									Visual Go/No-Go task		Visual Go/No-Go task						Motor tracking task
		Single Task	Dual Task	Triple Task	Single Task	Single Task	Single Task	Dual Task	Dual Task	Dual Task	Triple Task	Triple Task	Triple Task	Dual Task	Triple Task	Dual Task	Dual Task	Dual Task	Triple Task	Triple Task	Triple Task	Triple Task
Subject #	Time Since Wake (h)	Mean RT (ms)	Mean RT (ms)	Mean RT (ms)	False positives	False negatives	No. of errors	False positives	False negatives	No. of errors	False positives	False negatives	No. of errors	Mean RT (ms)	Mean RT (ms)	False positives	False negatives	No. of errors	False positives	False negatives	No. of errors	Time on target (%)
1	3	946.6	1043.13	1055.13	0	0	0	0	0	0	0	0	0	1142.35	1078.96	0	2	2	0	1	1	0.993424
1	5	946.033	1101.1	904.733	0	0	0	0	0	0	0	0	0	948.083	1063.16	0	1	1	0	0	0	0.998187
1	7	871	1028.97	999.333	1	0	1	1	0	1	1	0	1	1060.52	1012.5	0	2	2	0	3	3	0.999314
1	9	902.3	1004.7	1052.14	0	0	0	0	0	0	0	1	1	886.652	1059.64	0	2	2	0	0	0	0.995211
1	11	885.3	1050.3	1011.62	0	0	0	0	0	0	1	1	2	944.087	1105.64	0	2	2	0	0	0	1
1	13	868.433	1062.03	901.233	0	0	0	0	0	0	1	0	1	903.36	1104.68	0	0	0	0	0	0	0.996123
1	15	1041.1	1239.03	1172.73	0	0	0	0	0	0	0	0	0	1224.44	1129.44	0	0	0	0	0	0	0.999326
1	17	913.345	1105.63	1044.83	0	1	1	0	0	0	1	0	1	1140.17	1023.04	0	1	1	1	2	3	0.98412
1	19	1100.4	1057.76	1061.13	0	0	0	1	1	2	1	0	1	1076.74	1132.21	0	2	2	0	1	1	0.987423
1	21	1152.9	1409.79	1522.56	2	0	2	0	2	2	1	3	4	1333.63	1465.29	0	6	6	0	4	4	0.923499
1	23	1243.37	1034.46	1513.14	1	3	4	1	4	5	0	1	1	1182.26	1471.61	1	2	3	0	2	2	0.814302
1	25	1031.41	1375.85	1278.15	0	1	1	2	3	5	0	3	3	1312.41	1552.18	0	3	3	0	8	8	0.713274
1	27	1375.43	1311.32	1029.86	1	2	3	0	2	2	0	1	1	1214.41	1251.78	1	3	4	0	2	2	0.984944
1	29	1048.2	1196.17	1053	0	0	0	2	1	3	1	0	1	1365.96	1113	2	0	2	1	0	1	0.990884
1	31	977.433	1263.07	1159.5	1	0	1	1	1	2	1	0	1	1412.71	1055.36	1	1	2	0	0	0	0.982257
1	33	1168	1508.24	1049.57	0	0	0	0	1	1	2	0	2	1312.74	1099.52	0	2	2	1	2	3	0.986688
1	35	1011.17	1354.14	1061.8	1	0	1	0	2	2	1	0	1	1159.25	979.96	0	1	1	0	0	0	0.987534
1	37	1088.48	1448.27	1303.44	0	1	1	0	0	0	2	3	5	1281.68	1273.08	0	0	0	1	1	2	0.997741
2	3	688.967	864.862	1002.47	0	0	0	0	1	1	1	0	1	808.083	1152.04	2	1	3	0	1	1	0.97854
2	5	770.3	984.4	1114.33	0	0	0	1	0	1	0	0	0	916.227	1099.71	0	3	3	0	1	1	0.774771
2	7	715.8	935.2	1055.31	1	0	1	0	0	0	1	1	2	798.391	1296.67	1	2	3	1	4	5	0.933882
2	9	777.4	844.367	861.828	1	0	1	0	0	0	0	1	1	691.261	914.667	1	2	3	0	1	1	0.949929
2	11	765.333	1066.6	1095.4	0	0	0	0	0	0	1	0	1	768.68	1002.48	0	0	0	0	0	0	0.981688
2	13	722.033	1114.03	892.967	0	0	0	1	0	1	1	0	1	883.583	893.136	0	1	1	0	3	3	0.99086
2	15	860.033	1026.27	1067.71	1	0	1	0	0	0	1	2	3	836.6	1068.48	1	0	1	0	2	2	0.899083
2	17	1079.53	1181.64	1160.15	0	0	0	0	5	5	0	4	4	1124.4	1123.1	1	5	6	1	4	5	0.694855
2	19	937.786	1269.62	1297.16	1	2	3	1	4	5	3	5	8	1486.37	1615.29	1	6	7	3	8	11	0.549846
2	21	1157.24	1007.18	1406.96	0	1	1	1	2	3	0	4	4	925.579	1295.76	1	6	7	0	4	4	0.724766
2	23	1072.81	1294.48	1217.54	0	14	14	0	7	7	0	6	6	1251.88	1203	0	8	8	0	5	5	0.686353
2	25	1102.77	1101	1349.78	0	8	8	2	3	5	2	7	9	1297.94	1372.14	0	8	8	0	4	4	0.724227
2	27	1027.62	1414.18	1170.56	1	17	18	0	19	19	2	14	16	767.5	1353.92	0	21	21	0	12	12	0.429538
2	29	963.034	1257.41	1155.89	3	1	4	0	1	1	2	12	14	898.091	1703	0	3	3	0	11	11	0.513742
2	31	943.393	1142.32	1508.33	1	2	3	0	11	11	0	18	18	1279.25	872	0	13	13	1	21	22	0.235912
2	33	862.727	1307.88	1135.42	2	8	10	0	5	5	0	6	6	978.05	1127.11	0	5	5	0	7	7	0.657492
2	35	877.88	985.852	1090.8	0	5	5	2	3	5	0	5	5	983.2	1138.74	1	5	6	1	6	7	0.856071
2	37	935.444	1279.7	1025.23	3	3	6	0	10	10	0	4	4	1169.94	1203.9	0	9	9	0	4	4	0.890636
3	3	703.6	991.467	1024.63	1	0	1	0	0	0	1	0	1	952.043	1088.61	1	2	3	0	2	2	0.972401
3	5	728.433	998.867	1019.2	0	0	0	0	0	0	0	0	0	1092.92	1042.67	0	0	0	0	1	1	0.951445
3	7	742.867	1080.2	1034.53	0	0	0	1	0	1	0	0	0	994.88	1221.71	0	0	0	0	1	1	0.969453
3	9	828.483	1085.1	1047.8	1	1	2	1	0	1	1	0	1	998.125	1182.83	0	1	1	0	1	1	0.783192
3	11	764.143	1163.76	1019.83	1	2	3	0	1	1	2	1	3	952	1155	1	2	3	1	0	1	0.809457
3	13	838.133	1012.97	1053.07	0	0	0	0	0	0	0	0	0	1057.67	1107.4	1	1	2	0	0	0	0.909673
3	15	915.967	1328.67	1187.1	2	0	2	0	0	0	1	1	2	1133.64	1122.48	1	0	1	0	0	0	0.699287
3	17	845.267	1130.7	1337.96	2	0	2	0	0	0	2	4	6	1028.29	1130.43	0	1	1	2	2	4	0.826492
3	19	1099.04	974.75	1095.8	2	2	4	0	2	2	2	0	2	952.36	1185.33	0	0	0	0	1	1	0.733852
3	21	1235.9	1284.82	1524.04	3	1	4	2	2	4	1	2	3	1251.83	1407.35	2	2	4	0	2	2	0.866698
3	23	987.741	1505.42	1439.64	5	3	8	4	4	8	2	2	4	1226	1393.41	2	5	7	1	3	4	0.720571
3	25	1281.43	1256.56	1507.38	5	7	12	2	3	5	0	6	6	1220.25	1425.95	2	9	11	1	6	7	0.724732
3	27	890.37	1577	1246.11	1	3	4	0	2	2	1	2	3	1281.33	1187.55	0	1	1	2	3	5	0.910301
3	29	1091.68	1285.88	1548.2	2	5	7	4	6	10	3	5	8	938.682	1283.5	1	3	4	1	7	8	0.581994
3	31	1335.53	1503.12	1675.72	2	11	13	0	6	6	4	5	9	1108.6	1268.47	1	5	6	1	6	7	0.685115
3	33	873	1298.38	1339	3	3	6	0	4	4	2	2	4	1046.68	1267.16	0	0	0	0	0	0	0.987646
3	35	1098.12	1203.52	1126.81	0	4	4	2	5	7	0	3	3	1041.13	1015.18	1	2	3	0	3	3	0.961538
3	37	1138.37	1377.12	1361.45	0	0	0	2	4	6	1	1	2	983.75	1045	0	1	1	1	0	1	0.986964
4	3	901.9	1028.13	1008.67	0	0	0	0	0	0	0	0	0	870.87	1042.58	0	2	2	0	1	1	0.993816
4	5	862.233	1017.57	1055.1	0	0	0	0	0	0	0	0	0	816.095	953.05	0	4	4	0	5	5	0.998404
4	7	877.467	976.6	1081.07	0	0	0	0	0	0	0	1	1	849.826	977.571	0	2	2	1	4	5	0.99634
4	9	736.828	970.793	1064.97	1	1	2	0	1	1	0	1	1	1005.77	957	0	3	3	0	1	1	0.99157
4	11	868.067	1095.39	1028.5	0	0	0	3	2	5	0	0	0	978.875	917.348	0	1	1	0	2	2	0.995191
4	13	959.733	1321.14	1223.21	0	0	0	0	2	2	3	2	5	1091.38	1124.88	1	1	2	0	0	0	0.992906
4	15	960.6	1048.3	1102.93	0	0	0	0	0	0	1	1	2	963.565	1050.55	0	2	2	0	3	3	1
4	17	932.533	1203.17	1204.33	0	0	0	1	1	2	0	0	0	1129.95	1187.67	0	4	4	0	1	1	0.995905
4	19	1343.79	1183.3	1218.14	2	1	3	0	3	3	1	2	3	969.957	1130.5	0	2	2	0	1	1	0.993373
4	21	1005.1	1208	1564.61	0	0	0	1	1	2	1	2	3	1348.14	1146.45	0	4	4	1	3	4	0.906658
4	23	1529.71	1253.2	1272.68	1	6	7	1	10	11	1	8	9	1255.82	1171.86	1	8	9	0	4	4	0.83269
4	25	1322.79	1688.08	1661.67	0	11	11	2	18	20	3	12	15	1771.17	1499.6	1	19	20	3	10	13	0.695
4	27	1180.63	1481.39	1445.64	0	11	11	1	7	8	0	5	5	1122.64	1276.33	2	14	16	0	10	10	0.762089
4	29	1034.5	1439.24	1401.26	1	8	9	0	5	5	0	7	7	1390.29	1545.21	0	11	11	0	6	6	0.715453
4	31	1187.44	1269.14	1336.96	0	12	12	0	2	2	1	5	6	1302.68	1180.38	0	3	3	1	4	5	0.877221
4	33	1151.52	1246.25	1348.42	0	9	9	4	2	6	0	6	6	1213.38	1119.11	1	4	5	0	6	6	0.884519
4	35	1103.76	1340.33	1563.88	0	9	9	1	12	13	3	13	16	1205.82	1367.18	1	14	15	0	8	8	0.571461
4	37	1075.24	1392.73	1513.8	0	1	1	0	8	8	1	5	6	1332.93	1559.72	0	10	10	1	7	8	0.845238
5	3	823.5	844	826.467	0	0	0	0	0	0	0	0	0	808.182	1001.52	0	3	3	0	2	2	1
5	5	907.067	947.931	783.8	0	0	0	0	1	1	0	0	0	927.864	910.5	0	3	3	0	3	3	1
5	7	871.333	895.207	824.167	0	0	0	0	1	1	0	0	0	810.13	918.6	0	2	2	0	0	0	1
5	9	877.967	911.5	851.867	0	0	0	0	0	0	0	0	0	848.875	917.5	0	1	1	0	1	1	1
5	11	955.933	946.567	942.233	0	0	0	0	0	0	0	0	0	814.217	946.217	0	2	2	0	2	2	1
5	13	923.167	990.233	865.033	0	0	0	0	0	0	0	0	0	862.48	875.739	0	0	0	0	2	2	1
5	15	986.333	961.724	879.567	0	0	0	1	1	2	0	0	0	866.125	843.375	0	1	1	0	1	1	1
5	17	1007.57	940.207	960.633	0	0	0	1	1	2	0	0	0	879.5	1043.21	0	1	1	0	1	1	1
5	19	945.733	1068.5	955.4	0	0	0	0	0	0	0	0	0	919.6	1073.23	0	0	0	0	3	3	1
5	21	1091.21	1140.35	1113.79	0	1	1	0	4	4	0	2	2	1262.19	1048.57	0	4	4	1	2	3	0.942232
5	23	1457.86	1170.21	1457.59	1	2	3	1	1	2	0	3	3	1066.52	1257.05	0	4	4	0	4	4	0.840174
5	25	1239.07	1257.89	1230.44	1	2	3	0	2	2	0	3	3	1095.71	1085.74	0	4	4	0	6	6	0.886754
5	27	1067.97	1023.86	1079.43	0	0	0	1	1	2	0	0	0	763	960.913	0	4	4	0	2	2	0.964529
5	29	895.133	1080.89	1108.66	1	0	1	0	3	3	0	1	1	828.708	1314.26	0	1	1	0	2	2	0.967008
5	31	971.536	1024.75	1135	0	2	2	0	2	2	0	0	0	972.7	1058.43	0	5	5	0	2	2	0.942707
5	33	1039.53	1126.29	1232.17	1	0	1	0	2	2	0	1	1	782.087	948	0	2	2	0	4	4	0.971828
5	35	1102.93	1054.41	1183.8	0	1	1	0	1	1	0	0	0	889.25	840.435	0	5	5	1	2	3	0.992473
5	37	1624.53	1056.93	1059.53	0	0	0	0	0	0	0	0	0	882.56	973.087	0	0	0	0	2	2	1
6	3	711.8	934.333	880.433	0	0	0	0	0	0	0	0	0	712.667	843.708	0	1	1	0	1	1	0.999333
6	5	727.767	981.533	941.767	1	0	1	0	0	0	0	0	0	905.125	877.13	1	1	2	1	2	3	0.99511
6	7	679.733	937.897	894.1	1	0	1	1	1	2	1	0	1	914.391	861.88	1	2	3	0	0	0	0.991778
6	9	632.3	822.379	1072.83	0	0	0	0	1	1	1	0	1	849.88	944.652	0	0	0	1	2	3	0.998889
6	11	645.433	956.367	1165.14	1	0	1	3	0	3	1	1	2	881.043	851.96	0	2	2	0	0	0	0.999333
6	13	689.467	972.759	1078.5	0	0	0	1	1	2	0	0	0	873.762	878.75	0	4	4	0	1	1	1
6	15	764.767	993.167	931.138	0	0	0	0	0	0	1	1	2	891.783	896.28	0	2	2	0	0	0	1
6	17	746.7	1159.73	1336	0	0	0	1	0	1	1	2	3	978.391	1136.64	0	2	2	1	3	4	0.985991
6	19	754.3	1146.37	1245.19	0	0	0	2	3	5	2	3	5	1284.59	1149.08	0	3	3	0	0	0	0.972444
6	21	914.222	1384.04	1392.81	0	3	3	2	2	4	1	3	4	1139.67	1094.42	0	4	4	3	6	9	0.960222
6	23	1093.62	1372.43	1420.63	0	4	4	0	2	2	1	3	4	1386.55	1023.33	0	5	5	0	4	4	0.837742
6	25	879.241	1254.11	1258.68	0	1	1	0	3	3	2	2	4	1119.06	1325.26	1	8	9	0	2	2	0.948444
6	27	956.481	1233.38	1249.64	0	3	3	1	4	5	2	5	7	1203.77	1012.33	1	3	4	2	1	3	0.963556
6	29	891.552	1238.28	1156.41	0	1	1	0	1	1	1	1	2	920	1006.84	0	6	6	0	0	0	0.981111
6	31	923.37	1284.18	1274	1	3	4	2	2	4	1	2	3	1060.39	1245	1	2	3	1	7	8	0.959324
6	33	1041.64	1391.21	1281.25	2	2	4	1	6	7	1	2	3	903.095	978.833	0	4	4	0	1	1	1
6	35	862.4	1076.97	1211.83	0	0	0	0	0	0	1	0	1	767.125	961.917	0	1	1	1	1	2	0.998222
6	37	951.2	1369.19	1612.5	0	5	5	0	3	3	0	2	2	1282.8	1179.73	0	0	0	0	3	3	0.986664
7	3	879.4	1078.9	1002.9	0	0	0	0	1	1	0	0	0	795.682	879.87	0	3	3	0	2	2	0.994519
7	5	803.6	1019.85	1065.14	0	0	0	1	3	4	0	1	1	920.619	903.25	0	4	4	0	1	1	0.989331
7	7	825.276	975.483	1156.83	2	1	3	1	1	2	0	1	1	939.864	879.783	1	3	4	0	2	2	0.993215
7	9	886.481	1065.52	1236.07	4	3	7	1	1	2	2	1	3	974.292	1140.76	0	1	1	1	4	5	0.989469
7	11	882.103	1237.39	1131.12	0	1	1	2	2	4	3	4	7	1033.12	1049.04	0	1	1	0	1	1	0.989016
7	13	792	998.967	1218.11	0	1	1	0	0	0	2	3	5	919.682	1067.5	0	3	3	0	3	3	0.99312
7	15	1214.05	1271.04	1221.96	1	8	9	1	5	6	1	5	6	1231.15	1162.13	0	5	5	0	2	2	0.94108
7	17	1165.85	1214.88	1246.95	3	10	13	1	5	6	3	10	13	1365.72	1174.86	0	7	7	2	4	6	0.92324
7	19	1102.17	1518.5	1230.7	2	12	14	2	8	10	1	3	4	1513.79	1168.94	2	11	13	1	7	8	0.905236
7	21	1281.25	1474.18	1285.41	0	10	10	5	8	13	3	8	11	1275.65	1240.94	2	8	10	0	7	7	0.868204
7	23	1226.25	1734.75	1405.44	0	22	22	0	26	26	1	21	22	1256.5	1597.1	1	23	24	0	15	15	0.385365
7	25	1603	1224	1436.68	0	20	20	2	26	28	1	11	12	1108.14	1431.41	2	18	20	0	8	8	0.700071
7	27	1114.27	1234.5	1112.05	1	8	9	1	8	9	0	9	9	1350.63	1235.2	0	6	6	0	5	5	0.819066
7	29	1108.31	1413.26	1199.2	2	14	16	2	11	13	0	15	15	1491.56	1515	0	9	9	0	11	11	0.639022
7	31	1051.24	1323.33	1267	0	13	13	2	9	11	2	7	9	1040.68	1259.16	0	6	6	1	6	7	0.915163
7	33	1114.57	1094.28	1032.61	0	16	16	3	1	4	0	2	2	1104.05	1055.27	2	6	8	1	3	4	0.998827
7	35	1065.73	993.231	1431.17	0	4	4	3	4	7	1	7	8	1148.54	1050.65	1	1	2	0	5	5	0.992293
7	37	1096.2	1408.36	1291.63	0	10	10	2	8	10	0	11	11	1242.8	1255.42	1	10	11	2	6	8	0.82909
8	3	694.2	810.2	744.4	0	0	0	0	0	0	0	0	0	561.625	654.583	0	1	1	0	1	1	1
8	5	662.533	803.3	726.267	0	0	0	1	0	1	0	0	0	766.364	733.696	0	3	3	0	2	2	1
8	7	698.067	798.433	714.9	0	0	0	0	0	0	1	0	1	632.565	611.375	0	2	2	0	1	1	1
8	9	737.967	784.167	773.567	0	0	0	0	0	0	0	0	0	644.957	678.045	0	2	2	0	3	3	1
8	11	675.3	795.533	734.767	0	0	0	0	0	0	0	0	0	608.652	554.818	0	2	2	0	3	3	1
8	13	687	808.133	733.4	0	0	0	0	0	0	0	0	0	589	579.375	0	0	0	0	1	1	1
8	15	653.4	798.4	699.067	0	0	0	1	0	1	0	0	0	613.16	598.043	0	0	0	0	2	2	1
8	17	770.133	858.867	750.033	0	0	0	0	0	0	0	0	0	620.333	603	0	1	1	0	2	2	1
8	19	648.267	693.467	653.267	0	0	0	0	0	0	0	0	0	517.5	545.625	0	1	1	0	1	1	1
8	21	733.2	879.933	747.067	0	0	0	0	0	0	0	0	0	691.5	636.909	0	3	3	0	3	3	1
8	23	834.4	881.379	915.2	0	0	0	0	1	1	0	0	0	646.333	710.087	0	1	1	1	2	3	1
8	25	790.967	1030.8	873.821	0	0	0	1	0	1	1	2	3	804.375	636.28	1	1	2	0	0	0	0.998655
8	27	821.067	1062.25	945.233	0	0	0	1	2	3	0	0	0	753	745.789	1	2	3	0	6	6	0.998411
8	29	767.633	885.467	848.467	0	0	0	0	0	0	0	0	0	655	624.261	0	2	2	0	2	2	1
8	31	783.567	912.483	920.867	0	0	0	0	1	1	0	0	0	657.68	634.8	0	0	0	0	0	0	1
8	33	857.667	1004.8	953.966	0	0	0	0	0	0	1	1	2	701.409	753.125	1	3	4	0	1	1	0.996566
8	35	883.4	1054.83	1014.1	0	0	0	0	0	0	0	0	0	753.087	792.913	1	2	3	0	2	2	1
8	37	806.967	1047.83	1035.55	0	0	0	0	0	0	1	1	2	640.08	662.682	0	0	0	0	3	3	1
9	3	837.167	1068.34	980.167	0	0	0	2	1	3	1	0	1	1163.77	1027.21	0	3	3	0	1	1	0.999765
9	5	852.667	1046.52	943.643	0	0	0	1	1	2	1	2	3	1036.92	1254.16	0	1	1	0	0	0	0.993443
9	7	878.633	980.857	958.808	0	0	0	3	2	5	0	4	4	1044.04	1100.35	0	1	1	0	2	2	0.993683
9	9	865.207	1197.97	1033.96	1	1	2	1	0	1	1	2	3	1115.91	1075.48	0	3	3	0	2	2	0.989021
9	11	834.276	961.793	1157.38	0	1	1	0	1	1	1	1	2	1027.12	1145.96	1	1	2	0	0	0	0.991479
9	13	832.138	1111	1245.29	1	1	2	0	3	3	0	2	2	1039.71	1128.64	1	1	2	0	0	0	0.964554
9	15	854.9	1021.13	1042.82	0	0	0	0	0	0	1	2	3	1002.44	989.125	0	0	0	0	1	1	0.991048
9	17	753	1088.63	1119.97	0	0	0	0	0	0	1	0	1	1001.62	1050.24	0	1	1	1	0	1	0.995269
9	19	826.333	1083.76	1272.86	1	0	1	0	1	1	1	1	2	1115.58	1384.62	0	1	1	0	1	1	0.999764
9	21	896.367	1327.93	1255.73	0	0	0	0	1	1	0	0	0	1327.96	1233.08	0	0	0	1	1	2	0.99441
9	23	952.767	1131.87	1273.37	0	0	0	0	0	0	2	3	5	1223	1293.17	0	2	2	0	7	7	0.941121
9	25	827.786	1232.23	1337.69	0	2	2	1	4	5	1	4	5	1177	1344.28	0	4	4	0	7	7	0.893652
9	27	887.586	1104.42	1359.04	1	1	2	0	4	4	0	5	5	1162.38	1362	0	1	1	0	3	3	0.959758
9	29	976.033	1393.35	1465.56	0	0	0	0	4	4	3	12	15	1137.17	1495.53	1	7	8	0	8	8	0.808536
9	31	1007.5	1363.9	1216.19	1	0	1	1	0	1	3	4	7	1178.63	1133.52	0	6	6	0	2	2	0.992304
9	33	1243.24	1246.96	1463.04	1	1	2	1	3	4	0	3	3	1218.81	1448.05	0	4	4	2	6	8	0.90513
9	35	1253.6	1296.4	1379	0	0	0	1	5	6	0	11	11	1053.17	1495.4	0	2	2	1	5	6	0.792515
9	37	1184.9	1315.56	1245.75	0	1	1	0	3	3	0	2	2	1204.75	1159.38	0	1	1	1	1	2	0.939169
10	3	773.633	1018.34	1042.63	0	0	0	2	1	3	0	0	0	1038.24	1132.29	0	0	0	0	1	1	0.995513
10	5	869.542	1030.13	1104.93	0	6	6	1	0	1	1	0	1	924.56	1094.35	0	0	0	1	2	3	0.994828
10	7	847.633	1043.87	953.034	0	0	0	0	0	0	0	1	1	952.542	944.667	0	1	1	0	1	1	0.99901
10	9	891.4	1013.23	1109.41	1	0	1	0	0	0	1	1	2	868.208	811.565	1	1	2	0	2	2	0.978148
10	11	784.667	1033.17	958.433	0	0	0	4	1	5	2	0	2	926.04	889.417	0	0	0	0	1	1	0.99777
10	13	859.1	1100.37	927.433	0	0	0	0	0	0	0	0	0	912.4	795.739	0	0	0	1	2	3	1
10	15	875	1031.72	1063.21	0	1	1	1	1	2	2	1	3	1031.96	928.292	0	1	1	0	1	1	1
10	17	864.833	1064.63	1181.86	0	0	0	0	0	0	0	2	2	957.72	979.292	0	0	0	0	1	1	0.980636
10	19	1025.93	1199.57	1256.61	0	0	0	0	0	0	0	2	2	1000.52	871.75	0	0	0	1	1	2	0.977494
10	21	883.667	1265	1191.96	0	0	0	0	0	0	1	3	4	1036.36	899.4	0	0	0	0	0	0	0.99975
10	23	995.633	1312.88	1601.08	0	0	0	3	4	7	5	6	11	1244.39	1339.9	1	2	3	4	5	9	0.891414
10	25	1040.58	1262.29	1430.05	0	6	6	1	9	10	1	10	11	1457.71	1598.71	1	4	5	2	8	10	0.693812
10	27	1172.81	1541.7	1825.57	3	9	12	5	7	12	1	9	10	1329.89	1723.45	0	7	7	2	5	7	0.598801
10	29	1038.91	1431.44	1469.28	3	7	10	5	5	10	3	12	15	1330.75	1641.43	5	9	14	3	18	21	0.614697
10	31	870.393	1299.54	1466.43	1	2	3	1	4	5	0	7	7	1105.81	1328.06	0	4	4	1	7	8	0.857953
10	33	869.414	1180.6	948.7	1	1	2	0	0	0	1	0	1	997.2	863.68	0	0	0	1	0	1	1
10	35	924.036	1311.78	1348.03	0	2	2	2	3	5	2	0	2	911.16	946.455	0	0	0	2	3	5	0.970509
10	37	790.167	1110.55	935.552	0	0	0	1	1	2	2	1	3	852.04	772.6	0	0	0	0	0	0	1
11	3	620.633	753.167	801.8	1	0	1	0	0	0	0	0	0	552.417	704.227	0	1	1	1	3	4	0.997861
11	5	622.1	820.667	781	0	0	0	0	0	0	0	0	0	667.304	682.542	0	2	2	0	1	1	1
11	7	744.767	846.2	867.833	0	0	0	0	0	0	0	0	0	740	668.68	0	0	0	0	0	0	1
11	9	653.133	822.333	820.138	0	0	0	0	0	0	0	1	1	533.625	649	0	1	1	0	2	2	1
11	11	739.633	812.621	793.767	1	0	1	0	1	1	1	0	1	588.16	678.13	0	0	0	0	2	2	1
11	13	764.5	907.31	858.034	0	0	0	0	1	1	1	1	2	710.36	607.042	1	0	1	0	1	1	1
11	15	865.833	1041.39	866.759	2	0	2	0	2	2	0	1	1	745	702.696	0	5	5	2	2	4	0.965476
11	17	942.138	1128.67	1138.5	1	1	2	1	0	1	0	6	6	964	709.227	3	7	10	1	3	4	0.911492
11	19	903.478	1046.18	1135.75	0	7	7	2	2	4	1	2	3	799.909	762.5	0	3	3	0	5	5	0.946848
11	21	1056	1092.12	1304.4	0	21	21	1	4	5	0	0	0	850.955	1039.83	1	3	4	0	2	2	0.954503
11	23	1177.05	1081.1	1049.14	0	8	8	0	1	1	1	9	10	897.333	1005	0	1	1	0	3	3	0.955289
11	25	767.294	924.423	1070.21	0	13	13	1	4	5	0	6	6	908	1014.05	1	4	5	0	6	6	0.83468
11	27	954.45	975.679	1118.24	0	10	10	1	2	3	0	1	1	931.28	879.391	0	0	0	0	2	2	0.97246
11	29	1011.68	1108	1123.9	0	8	8	0	6	6	2	10	12	917.158	882.765	2	6	8	0	8	8	0.865729
11	31	1006.65	985.828	889.852	2	4	6	0	1	1	0	3	3	735.217	837.25	0	2	2	1	9	10	0.92783
11	33	941.68	1196.76	932.6	0	5	5	1	9	10	2	15	17	856.235	1045.05	2	8	10	0	6	6	0.841171
11	35	898.393	1121.84	967.826	0	2	2	2	5	7	2	7	9	940.905	1051.79	0	4	4	0	6	6	0.907262
11	37	1102.23	1235.2	1101.58	0	8	8	1	5	6	2	4	6	861.778	894.542	0	7	7	0	1	1	0.940419
12	3	616.333	649.9	653.1	0	0	0	0	0	0	0	0	0	490.318	508.042	0	3	3	0	1	1	0.999278
12	5	606.267	624.167	630.167	0	0	0	0	0	0	0	0	0	483.826	449.92	0	2	2	0	0	0	1
12	7	642.533	669	728.1	0	0	0	0	0	0	0	0	0	480.64	521.84	0	0	0	1	0	1	0.999761
12	9	627.2	632.667	659.833	0	0	0	0	0	0	0	0	0	577.042	580.583	0	1	1	0	1	1	1
12	11	608.8	643.933	619.233	0	0	0	0	0	0	0	0	0	518.417	506.87	0	1	1	0	2	2	1
12	13	686.8	620.533	683.7	0	0	0	0	0	0	0	0	0	522.68	499.696	0	0	0	0	2	2	1
12	15	693.567	697.567	636.067	0	0	0	0	0	0	0	0	0	585.083	520.32	0	1	1	1	0	1	1
12	17	633.9	685.833	727.233	0	0	0	0	0	0	0	0	0	562.76	562.44	0	0	0	2	0	2	0.999063
12	19	736.033	796.333	848.333	0	0	0	0	0	0	0	0	0	633.042	584.792	0	1	1	0	1	1	1
12	21	725.867	813.821	861.467	0	0	0	0	2	2	0	0	0	744.478	697.478	0	2	2	0	2	2	0.998808
12	23	898.367	835.37	1048	1	0	1	2	3	5	0	2	2	652.739	746.048	0	2	2	1	4	5	0.964412
12	25	968.379	1116.62	1100.75	0	1	1	0	1	1	1	6	7	759.8	1021.82	2	5	7	1	8	9	0.830593
12	27	884.267	960.793	1045.28	0	0	0	0	1	1	1	1	2	1045.95	1015.48	1	3	4	1	4	5	0.954039
12	29	708.333	862	966	0	0	0	0	0	0	1	4	5	804.591	829	0	3	3	1	4	5	0.959943
12	31	733.267	1087.1	996.12	0	0	0	0	1	1	2	5	7	931.364	868.222	0	3	3	1	7	8	0.944046
12	33	792.767	905.179	889.12	0	0	0	0	2	2	2	5	7	975.304	879	0	2	2	1	4	5	0.994989
12	35	776.367	883.655	1111.89	0	0	0	0	1	1	0	2	2	747.05	1049.42	0	5	5	0	1	1	0.990903
12	37	802.867	966.267	1089.83	0	0	0	0	0	0	1	6	7	823.87	875.609	0	2	2	1	2	3	0.992315
13	3	741.667	860.552	772.967	0	0	0	1	1	2	0	0	0	705.12	802.591	0	0	0	0	3	3	0.998602
13	5	584.133	834.367	853.633	0	0	0	0	0	0	0	0	0	729.042	799.043	0	1	1	0	2	2	1
13	7	662.833	899.733	862.367	0	0	0	0	0	0	1	0	1	827.727	792.167	0	3	3	0	1	1	1
13	9	617.367	950.967	824.867	0	0	0	0	0	0	0	0	0	748.458	704.375	0	1	1	0	1	1	1
13	11	729.867	802.9	825.933	0	0	0	0	0	0	1	0	1	755.957	747.045	0	2	2	0	3	3	1
13	13	662.533	850.433	843.8	0	0	0	0	0	0	0	0	0	816.381	732.391	0	4	4	0	2	2	1
13	15	712.724	894.2	830.5	1	1	2	1	0	1	0	0	0	723.318	841.348	0	3	3	0	2	2	0.998566
13	17	713.567	896.033	851.933	0	0	0	0	0	0	0	0	0	912.545	860.833	0	3	3	0	1	1	0.999044
13	19	825.433	850.833	1049.77	0	0	0	0	0	0	0	0	0	1151.17	1077.28	0	1	1	1	0	1	0.999759
13	21	874.133	1196.31	1362.07	2	0	2	0	1	1	2	3	5	1538.92	1149.58	2	1	3	0	6	6	0.988168
13	23	790.533	989.667	1009.41	0	0	0	0	0	0	0	1	1	966.174	764.72	0	2	2	0	0	0	0.994714
13	25	904.9	951.69	1024.53	1	0	1	1	1	2	1	0	1	917.318	1049	0	3	3	0	1	1	0.995449
13	27	1049.14	1053.41	1244.19	1	1	2	2	1	3	0	4	4	1132.36	954.292	0	3	3	0	1	1	0.980664
13	29	831	947.167	870.967	0	0	0	0	0	0	0	0	0	1036.45	795.455	1	5	6	0	3	3	0.999034
13	31	718.207	942	979.433	0	1	1	0	2	2	0	0	0	1128.48	895.087	1	2	3	0	2	2	0.993544
13	33	787.6	911.107	947.31	0	0	0	0	2	2	0	1	1	894.958	888.625	3	1	4	0	1	1	1
13	35	870.6	994.267	927.633	0	0	0	0	0	0	0	0	0	1204.52	781.652	0	2	2	0	2	2	0.992518
13	37	771.967	1226.57	1094.33	0	0	0	0	0	0	0	0	0	1022.48	913.783	0	4	4	0	2	2	0.998331
14	3	762.667	975.034	873.067	0	0	0	0	1	1	0	0	0	739.042	629.087	1	1	2	2	2	4	0.996047
14	5	675.933	862.929	865.714	1	0	1	3	2	5	0	2	2	665.609	621.636	0	2	2	0	3	3	0.944013
14	7	679.667	1120.27	936.276	0	0	0	1	0	1	1	1	2	850.458	634.792	1	1	2	2	1	3	0.986305
14	9	662.567	996.034	1119.43	2	0	2	1	1	2	2	2	4	805.583	862.042	0	1	1	0	1	1	0.949988
14	11	584.5	817.233	854.6	0	0	0	1	0	1	0	0	0	672.696	649.391	0	2	2	0	2	2	0.998752
14	13	740.4	930.6	849.633	0	0	0	0	0	0	1	0	1	800.64	691.24	0	0	0	0	0	0	0.997763
14	15	893.9	988.897	897.333	0	0	0	1	1	2	1	0	1	851.56	859.304	0	0	0	0	2	2	0.999508
14	17	665.967	970.483	948.308	1	0	1	1	1	2	3	4	7	836.16	854.087	0	0	0	0	2	2	0.948855
14	19	703.533	1025.69	1034.11	0	0	0	3	4	7	4	11	15	1199.55	1124.65	2	3	5	0	8	8	0.690895
14	21	741.724	1088.18	1401.23	1	1	2	6	8	14	2	8	10	1025	1467.31	2	5	7	1	12	13	0.56982
14	23	1044	1192.18	1456	1	5	6	2	13	15	2	17	19	954.786	991.111	0	11	11	0	16	16	0.395217
14	25	662.633	1036.81	1148.31	1	0	1	0	4	4	3	4	7	922.167	992.5	1	1	2	0	5	5	0.806708
14	27	770.964	961.696	1192.61	0	2	2	5	7	12	0	7	7	902	940.933	1	9	10	2	10	12	0.532557
14	29	834.038	1198.62	1480.55	3	4	7	2	9	11	2	19	21	1256.92	981.333	0	12	12	1	19	20	0.331678
14	31	853.923	1345.64	1077.82	0	4	4	1	2	3	3	8	11	972.118	798.353	2	8	10	0	8	8	0.832781
14	33	910.276	1097.05	1281.5	0	1	1	2	8	10	2	16	18	1284.53	1185.53	0	6	6	1	8	9	0.494297
14	35	947.786	1300.1	1318.65	1	2	3	1	10	11	1	13	14	1416.37	1065.5	0	6	6	2	7	9	0.622674
14	37	873.571	1166.65	1250.36	2	2	4	2	4	6	0	8	8	970.6	773.714	0	5	5	4	11	15	0.579545
15	3	942.7	1348.9	1251.03	0	0	0	1	1	2	1	1	2	1041.57	952.12	2	2	4	0	0	0	0.998155
15	5	1223.69	1176.93	1264.96	1	1	2	1	1	2	2	7	9	1174.04	1099.41	0	2	2	1	3	4	0.946923
15	7	1233.17	1239.07	1359.76	1	1	2	0	2	2	0	1	1	1084.86	1138.52	0	3	3	0	2	2	0.974925
15	9	1007.63	1124.52	1424.95	0	0	0	0	3	3	2	11	13	1163.61	1343.29	0	2	2	1	4	5	0.853933
15	11	942.964	1302.61	1396.03	4	2	6	2	2	4	0	1	1	1050.77	898.72	1	3	4	0	0	0	0.998621
15	13	1392.77	1317.19	1476.58	2	4	6	3	4	7	1	6	7	1066.42	1237.82	0	1	1	1	3	4	1
15	15	1021.03	1464.32	1590.46	3	1	4	2	2	4	2	4	6	1255.57	1030.54	1	4	5	0	1	1	0.993786
15	17	1309.9	1624.59	1854.27	2	0	2	4	8	12	7	15	22	1466.37	1246.19	2	6	8	3	9	12	0.825386
15	19	1329.62	1666.48	1626.89	3	4	7	0	5	5	4	12	16	1108.86	1226	0	4	4	1	5	6	0.815626
15	21	1264	1574.82	1715.89	3	9	12	2	19	21	4	12	16	1631.71	1518.2	2	18	20	2	10	12	0.666281
15	23	1422.83	1928.6	1787.21	0	12	12	4	15	19	4	16	20	1049.9	1225.19	0	15	15	3	9	12	0.601434
15	25	1232.78	1939.07	1718.36	1	7	8	3	15	18	2	16	18	1421.73	941.2	2	14	16	1	15	16	0.553049
15	27	992.357	1618.45	1767.58	3	16	19	3	8	11	1	18	19	1231.25	1255.27	0	9	9	1	14	15	0.599909
15	29	1295.89	1471.36	1496.62	7	12	19	5	19	24	3	22	25	1487.09	1943	4	14	18	6	17	23	0.338002
15	31	1251.62	1336.68	1569.62	2	6	8	1	11	12	5	14	19	1194.06	971.1	2	9	11	3	15	18	0.531438
15	33	1318.19	1522.5	1707.43	1	9	10	6	16	22	6	16	22	1321.3	1430.31	3	15	18	2	9	11	0.53546
15	35	1449.52	1427.6	1472.58	3	5	8	2	20	22	4	18	22	1492.62	1607	0	12	12	0	13	13	0.58092
15	37	1657.58	1757.83	1893.92	5	6	11	3	18	21	0	18	18	1353.15	1447.73	1	12	13	1	10	11	0.612681
16	3	1157.7	1347.48	1668.43	0	0	0	2	1	3	1	0	1	1093.75	1195.35	2	5	7	0	2	2	0.998837
16	5	1085.53	1561.7	1414.5	0	0	0	0	0	0	0	0	0	1058.33	1314.2	1	1	2	0	0	0	1
16	7	1103.83	1373.52	1699.93	0	0	0	0	1	1	0	0	0	1211.64	1349.42	0	0	0	4	1	5	0.983557
16	9	1109.43	1348.93	1556.97	0	0	0	1	1	2	0	0	0	1210.72	1241.08	0	0	0	0	0	0	1
16	11	1060.9	1350.33	1456.37	0	0	0	0	0	0	0	0	0	1162.04	1251.4	0	0	0	0	0	0	0.996793
16	13	993.433	1423.8	1357.93	0	0	0	0	0	0	0	0	0	1167.16	1185.8	0	0	0	0	0	0	0.996347
16	15	1098.27	1548.83	1526.17	0	0	0	0	0	0	0	0	0	1374.24	1243	0	0	0	0	2	2	0.993275
16	17	1041.1	1434.33	1516.73	0	0	0	0	0	0	0	0	0	1301.76	1426.18	0	0	0	1	3	4	0.973294
16	19	1089.63	1399.7	1694.17	0	0	0	0	0	0	0	1	1	1315.33	1518.79	1	1	2	0	1	1	0.964782
16	21	1002.37	1413.07	1655.79	0	0	0	0	1	1	0	2	2	1335.12	1537.28	0	1	1	2	0	2	0.982321
16	23	1111.47	1527.72	1528.12	0	0	0	0	1	1	1	6	7	1428.3	1377.35	1	2	3	0	2	2	0.904246
16	25	1072.21	1613.2	1517	0	2	2	1	0	1	1	3	4	1314.76	1555.45	1	4	5	1	3	4	0.853782
16	27	1051.72	1625.32	1438.43	0	1	1	2	2	4	2	7	9	1505.74	1462.25	1	2	3	0	5	5	0.825928
16	29	1074.97	1566.12	1603.09	0	0	0	0	5	5	4	7	11	1529.52	1615.5	1	2	3	2	1	3	0.912914
16	31	1129.41	1513	1674.91	1	1	2	1	2	3	2	8	10	1369.96	1603.15	2	2	4	1	5	6	0.797841
16	33	1276.7	1531.85	1657	1	0	1	2	4	6	4	9	13	1468.78	1888.28	1	2	3	1	7	8	0.86722
16	35	1286.13	1746.13	1636.41	0	0	0	0	0	0	0	3	3	1674.87	1628.39	0	2	2	2	2	4	0.965303
16	37	1312.4	1559.93	1273.9	0	0	0	0	0	0	0	0	0	1525.29	1503.77	0	1	1	0	3	3	0.994904
17	3	597.3	699.233	730.467	1	0	1	1	0	1	1	0	1	678.95	581.167	0	5	5	0	1	1	0.988448
17	5	604.433	750.033	678.367	0	0	0	0	0	0	2	0	2	664.833	719.217	0	1	1	0	2	2	0.985772
17	7	721.067	953.552	777.897	0	0	0	2	1	3	0	1	1	772.455	802.917	1	3	4	0	1	1	0.918892
17	9	687.4	776.517	894.931	0	0	0	0	1	1	1	1	2	676.136	810.727	0	3	3	0	3	3	0.941492
17	11	849.567	921.7	1018.14	1	0	1	1	0	1	3	1	4	728.36	958.273	0	0	0	1	3	4	0.942696
17	13	611.367	890.667	856.133	0	0	0	1	0	1	1	0	1	636	651.087	0	3	3	1	2	3	0.978189
17	15	817.929	883	1050.59	1	2	3	0	0	0	0	3	3	717.087	660.13	0	2	2	0	2	2	0.946913
17	17	826.9	1120.26	1145.32	1	0	1	1	3	4	0	5	5	836.125	786.476	0	1	1	2	4	6	0.873876
17	19	916.667	1213.52	1225.7	1	0	1	2	3	5	3	3	6	1072.77	971.625	0	3	3	1	1	2	0.813492
17	21	1233.96	1093.61	1223.16	1	7	8	0	7	7	2	11	13	1311.5	1081.37	2	5	7	0	6	6	0.575579
17	23	1219	1448.9	1210.29	1	19	20	2	9	11	0	13	13	1176.5	922.429	1	7	8	0	11	11	0.515219
17	25	1220.4	976	1247.26	2	15	17	4	17	21	1	3	4	1389.67	1055.14	0	16	16	1	4	5	0.867854
17	27	1101.53	1311.14	1335.27	0	15	15	5	9	14	2	4	6	1544.93	854.714	0	10	10	0	4	4	0.813888
17	29	985.3	1260.06	1097.96	5	10	15	1	13	14	2	6	8	1616.07	892.167	0	11	11	2	7	9	0.769046
17	31	874.923	1124.12	1476.59	2	4	6	2	14	16	2	13	15	1102.93	1194.21	1	11	12	2	11	13	0.563986
17	33	960.95	1214.26	1155.5	2	10	12	1	11	12	1	8	9	1465.06	924.632	1	8	9	0	6	6	0.822708
17	35	1008.52	1007.86	1049	2	7	9	0	2	2	0	2	2	829.35	807.714	0	5	5	0	4	4	0.868562
17	37	904.538	996.286	1093.07	4	4	8	0	2	2	2	2	4	1027.19	993.25	2	4	6	0	5	5	0.848066
18	3	654.967	758.633	681.633	0	0	0	0	0	0	0	0	0	554.417	527.44	1	1	2	0	0	0	1
18	5	648.1	834.067	735.552	0	0	0	0	0	0	0	1	1	596.083	561.87	0	1	1	0	2	2	1
18	7	612.517	828.267	719.7	0	1	1	0	0	0	0	0	0	552.25	603.667	1	1	2	0	1	1	1
18	9	617.933	736.357	724.6	0	0	0	1	2	3	0	0	0	554.609	513.043	0	2	2	0	2	2	1
18	11	641.767	867.448	718	0	0	0	1	1	2	2	0	2	620.76	618.667	0	0	0	0	1	1	0.999489
18	13	691.667	860.667	696.867	0	0	0	0	0	0	0	0	0	569.917	609.435	1	1	2	0	2	2	1
18	15	689.1	831.367	746.517	0	0	0	0	0	0	0	1	1	554	599.625	0	2	2	0	1	1	1
18	17	626.433	848.207	958.667	0	0	0	0	1	1	0	0	0	571.68	726	0	0	0	0	0	0	0.997209
18	19	801.1	1004.9	940.833	0	0	0	0	0	0	1	0	1	786.792	813.522	0	1	1	0	2	2	0.987374
18	21	699.267	873.207	921.964	0	0	0	0	1	1	1	2	3	780.208	965.72	0	1	1	0	0	0	0.941054
18	23	766.5	1009.24	1027.93	0	0	0	0	1	1	2	2	4	829.125	1031.48	0	1	1	1	4	5	0.930165
18	25	804.9	984.778	966.433	0	0	0	2	3	5	0	0	0	710.08	848.905	0	0	0	0	4	4	0.945428
18	27	741	1110.03	1063.9	2	1	3	0	1	1	0	0	0	785.5	1031.29	0	3	3	0	1	1	0.881739
18	29	935.2	1081.6	967.833	0	0	0	0	0	0	0	0	0	606.042	761.25	0	1	1	2	1	3	1
18	31	668.9	1004.9	856.833	0	0	0	0	1	1	0	0	0	699.625	708.08	0	1	1	0	0	0	0.997577
18	33	861.862	1123.97	1083.53	0	1	1	0	0	0	0	0	0	698.25	868.083	0	1	1	2	1	3	0.993309
18	35	809.033	876.462	1109.69	0	0	0	1	4	5	1	1	2	871.13	831.455	0	2	2	0	3	3	0.942949
18	37	922.2	1126.3	1023.32	0	0	0	0	0	0	2	2	4	820.667	781.708	0	1	1	1	1	2	0.990771
19	3	851.2	1099.7	808.897	0	0	0	0	0	0	1	1	2	660	845.84	0	2	2	1	0	1	0.999083
19	5	730.433	929.1	838.433	0	0	0	0	0	0	1	0	1	697.375	1005.79	0	1	1	0	1	1	0.999768
19	7	845.3	897.533	805.633	0	0	0	0	0	0	0	0	0	820.16	1001.12	0	0	0	0	1	1	1
19	9	837.133	987.433	795.067	0	0	0	1	0	1	0	0	0	912.2	1076.33	1	0	1	0	1	1	1
19	11	787.833	893.3	864.833	0	0	0	0	0	0	1	0	1	979.458	1035.96	0	1	1	0	2	2	0.997209
19	13	789.433	827.333	752.7	0	0	0	0	0	0	0	0	0	946.5	1204.56	0	3	3	0	0	0	1
19	15	712.071	944.233	980.067	0	2	2	1	0	1	1	0	1	952.76	1247.74	0	0	0	1	2	3	0.991845
19	17	918.467	1145.6	1016.17	0	0	0	0	0	0	0	1	1	1322.29	1167.1	1	1	2	0	4	4	0.891991
19	19	861	1028.56	1090.39	0	2	2	0	3	3	1	2	3	891.85	1423.35	3	5	8	1	5	6	0.895952
19	21	965.174	1095.79	1241.83	2	7	9	1	2	3	0	7	7	1157.52	1220.32	2	0	2	0	6	6	0.786321
19	23	956.68	910.393	1319.68	2	5	7	0	2	2	1	5	6	1629.75	1346.35	0	5	5	1	5	6	0.821183
19	25	1005.67	1193.54	1045.71	0	3	3	0	6	6	0	6	6	901.579	1548.5	1	6	7	1	5	6	0.808022
19	27	879.103	918.654	1188.62	0	1	1	1	4	5	1	4	5	953.5	1569.47	1	5	6	1	6	7	0.828947
19	29	919.893	1092	1234.04	0	2	2	1	4	5	1	5	6	1173.82	1244.58	0	3	3	2	6	8	0.886779
19	31	1070.17	1222.61	1087.28	0	0	0	1	2	3	1	1	2	975.522	1602.41	0	2	2	1	3	4	0.939617
19	33	1074.1	1193	1312.19	1	1	2	0	3	3	1	4	5	1108.6	1229.53	1	10	11	0	6	6	0.905725
19	35	999.28	1240.31	1267.12	0	5	5	0	4	4	1	5	6	924.316	1412.38	1	6	7	2	4	6	0.912742
19	37	976.733	997.586	853.069	0	0	0	1	1	2	1	1	2	1079.2	993.25	2	0	2	0	5	5	0.992431
20	3	491.067	697.267	661.367	2	0	2	0	0	0	0	0	0	773.458	624.545	0	1	1	0	3	3	1
20	5	550.933	720	742.033	1	0	1	1	0	1	0	0	0	725.955	669.087	0	3	3	1	2	3	1
20	7	612.5	793.367	720.933	0	0	0	1	0	1	0	0	0	961.958	748.435	0	1	1	0	2	2	0.99419
20	9	592.633	787.433	759.5	0	0	0	0	0	0	0	0	0	740.64	715.76	0	0	0	0	0	0	0.996569
20	11	679.967	820.172	820.333	1	0	1	1	1	2	0	0	0	844.636	836.696	0	3	3	0	2	2	0.996608
20	13	703.833	794.367	728.2	0	0	0	1	0	1	0	0	0	830.957	654	0	2	2	0	1	1	1
20	15	730.767	879.3	807.333	0	0	0	0	0	0	0	0	0	924.542	719.708	0	1	1	0	1	1	1
20	17	782.31	901.69	1016.83	1	1	2	1	1	2	1	0	1	853.348	796.696	1	2	3	0	2	2	0.978734
20	19	742.69	975.967	1080.41	1	1	2	1	0	1	2	1	3	1025.7	1054.75	0	2	2	0	1	1	0.960732
20	21	816.897	1077.15	1167.19	1	1	2	3	3	6	3	4	7	1360.67	1053.15	1	7	8	0	5	5	0.914293
20	23	880.571	1192.88	1018.61	2	9	11	2	5	7	5	12	17	1274.3	1152.69	1	5	6	1	12	13	0.681358
20	25	755.471	1215.31	1110.12	2	13	15	2	17	19	3	13	16	1666	909.467	2	20	22	1	10	11	0.673819
20	27	961.567	1199.67	1386.95	0	0	0	2	3	5	1	8	9	1258.5	1374.89	1	3	4	2	7	9	0.772915
20	29	975.633	1204.97	1472.72	1	0	1	1	1	2	1	12	13	1351.33	1112.19	0	1	1	0	9	9	0.619875
20	31	1103.52	1422.08	1385.22	2	1	3	4	6	10	6	12	18	1683.8	1590.21	0	5	5	0	6	6	0.723272
20	33	964.067	1035.96	1181.92	0	0	0	3	2	5	2	18	20	1305	1434.67	2	4	6	2	13	15	0.578935
20	35	788.167	968.333	1263.65	1	0	1	1	0	1	0	7	7	1251.5	1093.12	0	3	3	2	9	11	0.908718
20	37	797.517	1012.07	1048.26	0	1	1	1	3	4	2	3	5	1013.12	1014.48	0	1	1	0	0	0	0.997584
21	3	907.633	1343.7	1350.75	0	0	0	0	0	0	0	2	2	1151.04	913.75	1	0	1	0	1	1	1
21	5	1082.33	1343.38	1179.63	1	0	1	2	1	3	2	0	2	1265	990.6	0	0	0	0	0	0	0.996151
21	7	1053.37	1245.5	1294.31	0	0	0	1	0	1	0	1	1	949.833	1139.62	0	1	1	0	1	1	0.995235
21	9	1099.37	1358.1	1327.8	0	0	0	2	1	3	1	0	1	1070.92	1110.38	0	1	1	0	1	1	0.998098
21	11	912.833	1210.14	1348	1	0	1	0	1	1	2	2	4	1036.65	1041.46	0	5	5	2	1	3	0.996187
21	13	940.833	1329.83	1318.7	0	0	0	0	0	0	1	0	1	973.44	942.333	0	0	0	0	1	1	0.995038
21	15	1123.03	1063.24	1389.31	0	0	0	0	1	1	0	1	1	898.87	932.955	1	2	3	0	3	3	0.971184
21	17	1233.23	1251.44	1407.68	1	0	1	2	5	7	2	2	4	1247	1018.84	0	0	0	0	0	0	0.955748
21	19	939.154	1345.46	1378.5	1	4	5	3	2	5	0	8	8	1108.19	1035.25	0	4	4	3	5	8	0.841596
21	21	1356.18	1475	1525	1	8	9	4	13	17	1	8	9	1121.18	1244.1	1	8	9	2	4	6	0.798433
21	23	1102.17	1426.72	1564.24	2	7	9	3	12	15	3	9	12	1080.69	1304.08	1	12	13	2	13	15	0.721812
21	25	1286.54	1735.57	1254.39	2	6	8	2	9	11	1	12	13	1233.35	1199.76	2	8	10	2	4	6	0.714696
21	27	1147.77	1125.76	1475.7	1	4	5	0	9	9	3	7	10	1218.58	1068	0	6	6	0	8	8	0.762287
21	29	1098.76	1427	1650.21	2	13	15	2	6	8	2	11	13	1166.48	1298.22	2	2	4	0	7	7	0.783518
21	31	1103.33	1349.71	1336.23	3	9	12	2	2	4	2	4	6	1107	1077.91	1	3	4	2	2	4	0.894712
21	33	1078.46	1437.6	1268.72	1	2	3	1	5	6	1	5	6	1258.47	968.4	1	8	9	2	5	7	0.933001
21	35	978.846	1312.52	1403.48	0	4	4	0	1	1	2	5	7	1428.19	1182.35	0	4	4	0	5	5	0.871538
21	37	1066.26	1171	1474.56	0	3	3	2	4	6	2	5	7	1188.58	1256.5	1	1	2	1	5	6	0.832538
22	3	637.833	828.967	688.138	0	0	0	0	0	0	1	1	2	735	643.429	0	2	2	1	4	5	0.988258
22	5	546.167	730.103	646.967	1	0	1	0	1	1	0	0	0	717.417	556.9	1	1	2	1	5	6	1
22	7	644.433	881.667	845.464	0	0	0	0	0	0	0	2	2	830.833	940.955	0	1	1	0	3	3	0.897382
22	9	656.367	833.3	870.931	0	0	0	0	0	0	0	1	1	679.261	953.571	0	2	2	0	4	4	0.965122
22	11	727.367	1004.75	822.586	0	0	0	0	2	2	0	1	1	698.174	729.261	0	2	2	0	2	2	0.994611
22	13	760.2	1017.14	1016.72	0	0	0	1	1	2	0	1	1	830.783	770.25	0	2	2	0	1	1	0.99712
22	15	712.862	1008.53	1126.04	0	1	1	0	0	0	0	2	2	974.478	1210.82	0	2	2	0	3	3	0.850459
22	17	826.133	1149.96	1203	0	0	0	0	2	2	1	4	5	939.647	1507.11	0	8	8	0	7	7	0.722716
22	19	916.833	1099.5	1505.58	0	0	0	1	4	5	2	6	8	1088.95	1539.22	0	6	6	0	7	7	0.721904
22	21	921.077	1287.04	1336.95	0	4	4	2	6	8	2	10	12	1176	1099.5	1	15	16	0	11	11	0.66331
22	23	1116.35	1252.44	1526.83	0	4	4	0	5	5	0	7	7	1412.67	1450.4	0	10	10	0	10	10	0.538866
22	25	893.435	1067.79	1268.29	0	7	7	1	11	12	1	16	17	1072.74	1363.62	1	6	7	2	12	14	0.37792
22	27	919.407	1305.08	1452.12	1	3	4	0	6	6	0	5	5	1056.6	1451.85	0	5	5	0	5	5	0.687327
22	29	973.76	1211.52	1207.08	1	5	6	1	9	10	1	6	7	981.316	1675.22	1	6	7	0	16	16	0.576572
22	31	1162.82	1314	1433.57	0	8	8	2	12	14	1	9	10	1191.13	1299.94	0	10	10	2	8	10	0.595058
22	33	1141.7	1656.19	1652.47	1	7	8	0	9	9	0	11	11	1123.68	1382.18	0	6	6	1	14	15	0.404397
22	35	1052.07	1255.13	1301.68	3	2	5	1	7	8	1	11	12	756.421	1323.86	2	6	8	1	11	12	0.637069
22	37	918.828	1191.48	1411.95	0	1	1	0	3	3	1	11	12	1130.2	1413.94	1	5	6	1	9	10	0.62164
23	3	790.033	860	856.3	0	0	0	0	1	1	0	0	0	643.125	786.087	0	1	1	0	2	2	1
23	5	656	925.333	949.586	0	0	0	0	0	0	1	1	2	709.174	910.217	0	2	2	1	2	3	0.984801
23	7	810.033	846.207	803.069	0	0	0	0	1	1	1	1	2	706.708	830.636	0	1	1	0	3	3	0.993807
23	9	681.367	1004.32	1016.89	2	0	2	2	2	4	2	2	4	850.28	916.652	1	0	1	0	2	2	0.982261
23	11	739.9	827.233	814.7	0	0	0	0	0	0	1	0	1	743.619	781.167	1	4	5	0	1	1	1
23	13	675.267	747.967	823.9	0	0	0	0	0	0	0	0	0	720.5	729.48	0	1	1	0	0	0	1
23	15	749.6	848.233	918.367	0	0	0	0	0	0	1	0	1	818.958	829.136	0	1	1	0	3	3	1
23	17	781.567	946.759	892.793	2	0	2	0	1	1	0	1	1	782.286	854.826	0	4	4	0	2	2	0.964673
23	19	889.828	1065.6	1146.44	2	1	3	0	0	0	1	3	4	940.81	993.909	0	4	4	2	3	5	0.971778
23	21	914.897	1103.22	1218.5	0	1	1	0	3	3	0	4	4	992.619	919.714	0	4	4	1	4	5	0.953958
23	23	1036.53	1097.72	1341.08	1	0	1	0	5	5	0	4	4	1079.9	1319.17	3	4	7	0	1	1	0.891172
23	25	1111.52	1156.19	1270.12	1	5	6	2	9	11	1	5	6	1098.53	1352.72	0	10	10	2	7	9	0.87802
23	27	912.84	1191.35	966.417	0	5	5	1	4	5	4	6	10	1003.22	1349.68	3	7	10	1	3	4	0.881748
23	29	1167.08	1249.26	1224.88	1	6	7	1	3	4	3	5	8	1257.29	1132.67	1	4	5	0	1	1	0.898647
23	31	1147.44	1159.73	1250.21	2	5	7	1	4	5	1	2	3	1091.27	1104.59	2	3	5	1	3	4	0.974498
23	33	810.034	1037.77	1358.32	3	1	4	3	8	11	0	5	5	1324.86	1327.28	1	4	5	1	7	8	0.91741
23	35	981.741	1130.58	1206.69	1	3	4	2	4	6	1	4	5	929.45	1174.26	1	5	6	0	2	2	0.978838
23	37	1160.77	922.9	1118.57	0	0	0	0	0	0	0	0	0	811.391	999.375	0	2	2	0	1	1	0.998403
24	3	819.1	997.167	877.533	0	0	0	2	0	2	0	0	0	849.542	947.565	0	1	1	0	2	2	0.99802
24	5	747.967	1056.13	896.667	0	0	0	0	0	0	0	0	0	878.458	957.652	0	1	1	0	2	2	0.992892
24	7	710.567	858.31	820.833	1	0	1	0	1	1	0	0	0	816.261	902.409	0	2	2	0	3	3	0.998781
24	9	697.833	925.931	942.5	0	0	0	0	1	1	0	2	2	782.125	743.375	0	1	1	0	1	1	0.99877
24	11	778.667	931.667	1045.63	0	0	0	0	0	0	0	0	0	1082.91	738.391	0	2	2	0	2	2	1
24	13	778.033	925.533	862.767	0	0	0	0	0	0	0	0	0	871.208	725.625	0	1	1	0	1	1	1
24	15	777.867	865.367	818.933	0	0	0	0	0	0	1	0	1	856.7	758.182	0	5	5	0	3	3	0.998038
24	17	836.833	917.9	865.833	0	0	0	0	0	0	0	0	0	818.792	914.32	1	1	2	0	0	0	0.996894
24	19	737.133	942.821	960.5	0	0	0	1	2	3	1	0	1	893.75	926.708	0	1	1	0	1	1	0.991748
24	21	793.533	955	1073.34	0	0	0	0	1	1	1	1	2	845.1	973.591	0	5	5	0	3	3	0.993838
24	23	745.3	1009	1170.04	0	0	0	0	4	4	1	4	5	823	852.167	0	3	3	0	1	1	0.992276
24	25	814.333	1004.38	1079.69	2	0	2	1	1	2	1	1	2	1010.17	998.5	0	2	2	0	3	3	0.966812
24	27	1100.28	1268.46	1333.15	2	1	3	0	2	2	0	4	4	1031.7	1059.3	0	5	5	1	5	6	0.895007
24	29	907.345	1016.39	1234.92	3	1	4	2	7	9	1	6	7	925.273	1054.43	2	3	5	0	4	4	0.935428
24	31	778.286	953.4	1129.42	1	2	3	0	0	0	1	4	5	883.88	778.043	0	0	0	0	2	2	0.981053
24	33	759.714	1031	1166.81	2	2	4	0	2	2	4	4	8	1180.58	867.619	1	1	2	3	4	7	0.98419
24	35	867.433	1050.7	1006.41	0	0	0	0	0	0	1	1	2	970.478	815.36	0	2	2	0	0	0	0.999759
24	37	885.733	1060.07	1123.55	0	0	0	0	0	0	0	1	1	931.25	1139.43	0	1	1	1	2	3	0.992452
25	3	887.333	1097.6	1049.38	0	0	0	0	0	0	0	1	1	1102.48	946.913	0	0	0	0	2	2	1
25	5	983.733	922.607	1159.93	0	0	0	0	2	2	1	1	2	838.625	992.818	0	1	1	0	3	3	0.999282
25	7	849.133	1193.59	1075.42	0	0	0	1	8	9	1	4	5	929.958	1035.8	0	1	1	0	0	0	0.997649
25	9	927.833	1196	1269.22	0	0	0	0	1	1	0	3	3	1130.54	814.083	0	1	1	0	1	1	0.998812
25	11	1287	1449.52	1330.38	0	0	0	0	3	3	0	1	1	756.435	825.68	0	2	2	0	0	0	0.999048
25	13	1058.73	1059.48	1234.85	0	0	0	0	1	1	0	3	3	825.64	853.68	0	0	0	0	0	0	1
25	15	1196.8	1091.04	1258.73	0	0	0	0	2	2	0	4	4	933.48	934.4	1	0	1	0	0	0	0.999766
25	17	1364.83	1493.03	1380.52	0	0	0	0	1	1	0	1	1	1553.08	921.375	0	1	1	0	1	1	0.99353
25	19	1821.27	1779	1329.19	0	0	0	1	2	3	0	4	4	1282.96	986.958	0	0	0	0	1	1	0.973458
25	21	1397.1	1783.29	1389.44	0	1	1	0	2	2	0	3	3	1148.08	1091.95	0	1	1	0	3	3	0.950155
25	23	1599.5	1496.42	1293.25	3	4	7	0	6	6	0	10	10	1306.7	1224.67	0	2	2	0	4	4	0.857807
25	25	1641.29	1663.96	1457.77	0	2	2	0	5	5	1	8	9	1166.13	1196.09	0	2	2	0	3	3	0.807155
25	27	1317.6	1484.39	1719.22	1	5	6	0	7	7	0	7	7	1358.14	1362.6	0	3	3	0	5	5	0.875689
25	29	1814.45	1741.54	1596.26	0	1	1	0	2	2	2	11	13	1661.23	1293.52	0	3	3	0	2	2	0.87074
25	31	1401.55	1530.04	1800.09	0	1	1	0	7	7	2	7	9	1778.61	1293.47	0	2	2	0	8	8	0.693166
25	33	1454.79	1420.43	1520.43	1	1	2	0	7	7	1	7	8	971.083	860.316	0	1	1	0	6	6	0.972671
25	35	1760.34	1439.24	1872.43	0	1	1	0	1	1	0	9	9	1070	1245.48	0	1	1	0	4	4	0.880029
25	37	1526.2	1535.63	1414.33	0	0	0	0	3	3	0	3	3	1308.08	1040.48	0	0	0	0	2	2	0.996643
26	3	705.167	840.067	1054.53	0	0	0	0	0	0	0	0	0	752.56	889.833	0	0	0	0	1	1	0.997202
26	5	681.533	843.241	999.759	0	0	0	1	1	2	1	1	2	844	1237.05	0	2	2	0	3	3	0.998228
26	7	647.033	860.5	916.357	0	0	0	0	2	2	1	2	3	810.522	1047.38	0	2	2	0	4	4	0.984897
26	9	701.3	920.276	899.414	1	0	1	0	1	1	0	1	1	814.81	834.6	1	4	5	1	0	1	0.995527
26	11	666.467	865.643	920.6	0	0	0	1	2	3	0	0	0	736.952	943.087	0	4	4	0	2	2	0.999246
26	13	701.533	899.933	817.929	0	0	0	1	0	1	1	2	3	734	964.125	0	2	2	0	1	1	0.986483
26	15	748.767	957.464	1167.08	0	0	0	0	2	2	0	5	5	1155.33	1338.06	0	4	4	1	7	8	0.779064
26	17	965.1	1024.37	1096.27	0	0	0	0	0	0	2	8	10	848.636	1111.09	2	3	5	0	2	2	0.933585
26	19	846.862	1160	1254.58	0	1	1	1	2	3	1	6	7	874.1	1275.39	1	5	6	0	7	7	0.861188
26	21	924.633	1024.35	1231.96	1	0	1	0	4	4	0	7	7	1160.2	1275	0	5	5	3	9	12	0.831024
26	23	1176.57	1241	1135.09	1	2	3	1	6	7	0	7	7	910.895	1230.73	1	6	7	1	3	4	0.820117
26	25	956.731	1254.85	1356.38	2	4	6	0	10	10	2	9	11	1224	1439.73	1	8	9	5	10	15	0.745084
26	27	821.923	1029.46	1017.38	3	4	7	0	2	2	0	4	4	1001.53	1054	0	6	6	2	2	4	0.899898
26	29	1001.8	1162	1218.35	4	5	9	2	4	6	1	4	5	1123.52	1185	2	4	6	2	4	6	0.915284
26	31	852.269	1141.96	1353.24	2	4	6	0	2	2	4	9	13	1069.48	1213.4	0	4	4	1	5	6	0.875669
26	33	878.033	1257.04	1188.33	0	0	0	2	5	7	3	9	12	1090.14	1273.18	0	3	3	0	8	8	0.836989
26	35	639.267	989.467	971	0	0	0	0	0	0	0	1	1	870.75	872.87	0	1	1	0	2	2	0.989952
26	37	751.167	967.9	944.433	0	0	0	0	0	0	0	0	0	881.217	835.905	0	2	2	0	4	4	1
27	3	698.267	925.9	919.517	0	0	0	1	0	1	0	1	1	745.84	747.409	0	0	0	0	3	3	0.995964
27	5	675.933	1018.48	895.2	0	0	0	1	1	2	1	0	1	725.875	786.609	0	1	1	0	2	2	0.998813
27	7	771.367	1024.33	874.333	1	0	1	2	0	2	1	0	1	766.333	749.958	0	1	1	0	1	1	0.99834
27	9	746	917.333	903	1	0	1	2	0	2	0	0	0	728.5	673.208	0	1	1	0	1	1	0.992403
27	11	802.067	906.2	864.214	0	0	0	0	0	0	1	2	3	697.6	683.32	0	0	0	0	0	0	0.999523
27	13	819.267	906.867	917.733	0	0	0	1	0	1	0	0	0	730.833	773.375	0	1	1	0	1	1	1
27	15	797.4	965.233	997.107	0	0	0	0	0	0	0	2	2	827	659.043	0	1	1	0	2	2	0.97487
27	17	815.034	981.5	959.621	1	1	2	0	0	0	0	1	1	818.72	906.318	0	0	0	0	3	3	0.949668
27	19	827.967	953.1	992.552	1	0	1	0	0	0	2	1	3	856.304	875.435	0	2	2	0	2	2	0.915617
27	21	932.357	1002.93	1246.79	1	2	3	0	2	2	0	2	2	919.944	1092	0	7	7	0	2	2	0.848872
27	23	884.444	1100.88	1242.63	0	3	3	1	5	6	0	3	3	1018.94	943.611	0	9	9	0	7	7	0.795865
27	25	891.593	1328.62	984.897	0	3	3	0	9	9	1	1	2	1228.57	685.52	0	11	11	0	0	0	1
27	27	807.7	935.241	1137.22	0	0	0	0	1	1	1	3	4	803.833	813.348	0	1	1	0	2	2	0.973024
27	29	888.37	1056.33	1263.72	0	3	3	1	3	4	3	5	8	953.696	1118.85	0	2	2	0	5	5	0.672426
27	31	861.6	1273.68	1180.96	0	0	0	1	2	3	1	4	5	824.304	827.857	0	2	2	1	4	5	0.926835
27	33	989.333	1213.11	1348	0	3	3	0	2	2	0	8	8	892.5	1219.5	0	5	5	1	9	10	0.675234
27	35	970.5	1256.38	1309.69	0	0	0	1	1	2	1	1	2	987	868.92	0	1	1	0	0	0	0.990052
27	37	1033.37	1140.81	1388.13	1	0	1	0	4	4	2	7	9	915.619	1012.83	0	4	4	0	7	7	0.8
28	3	883.345	1059.83	1143.59	1	1	2	1	1	2	1	1	2	871.52	761.08	0	0	0	0	0	0	0.998141
28	5	1066.93	1153.46	1023.42	1	1	2	0	4	4	1	6	7	772.304	760.136	0	2	2	0	3	3	0.999298
28	7	992.433	1134.76	1199.77	0	0	0	1	1	2	0	0	0	880.333	775.2	0	1	1	0	0	0	0.999308
28	9	889.517	1097.12	1145.71	1	1	2	0	5	5	1	2	3	866.52	902.143	0	0	0	1	4	5	0.999312
28	11	1002.97	1054.16	925.692	0	0	0	2	5	7	0	4	4	992.12	868.895	0	0	0	0	6	6	1
28	13	1321.43	1308.53	1058.79	0	0	0	0	0	0	1	2	3	1266.32	816.52	0	3	3	0	0	0	1
28	15	1363.48	1431.17	1045.85	0	1	1	0	1	1	3	4	7	1387.65	932.458	0	2	2	0	1	1	0.998846
28	17	1059.33	1297	1406.96	0	6	6	3	5	8	2	5	7	1912.33	927.55	0	10	10	0	5	5	0.872048
28	19	1049.47	1499.33	1079.3	2	15	17	0	15	15	3	7	10	1196.73	1021.64	1	14	15	1	3	4	0.942923
28	21	1244.9	1073.1	1327.03	0	0	0	1	1	2	0	1	1	1357.56	943.792	0	0	0	1	1	2	0.996544
28	23	1078.03	1197.28	1319.69	0	1	1	2	12	14	1	4	5	892.733	936.85	0	10	10	0	5	5	0.960055
28	25	1261.57	1347.14	1302.88	0	16	16	1	9	10	2	14	16	938.696	1077.18	0	2	2	0	8	8	0.727921
28	27	1179.27	1428.83	1195.16	1	4	5	0	0	0	1	5	6	1201.71	773.4	0	4	4	0	0	0	0.995373
28	29	1005.44	1411	1208.58	4	12	16	0	2	2	2	4	6	1096.24	852.76	0	4	4	0	0	0	0.995177
28	31	1530.82	1569.73	1214.96	2	2	4	1	4	5	2	3	5	1714.33	978.125	0	4	4	0	1	1	0.96962
28	33	997.533	1415.33	1040.8	1	15	16	0	3	3	0	5	5	1039.86	754.381	0	4	4	0	4	4	0.999538
28	35	1206.66	1300.62	1155.74	1	1	2	0	1	1	3	7	10	1483.86	826.348	0	4	4	0	2	2	0.998618
28	37	1032.55	976.815	1194.11	2	1	3	1	3	4	1	2	3	1200.62	973.6	2	4	6	0	0	0	0.998418
29	3	709.733	867.8	866.033	0	0	0	1	0	1	0	0	0	711.24	974.12	0	0	0	0	0	0	1
29	5	826.133	982.633	821.6	0	0	0	0	0	0	0	0	0	754.913	888.84	0	2	2	0	0	0	1
29	7	832.667	935.143	947.2	0	0	0	0	2	2	1	0	1	821.174	1057.08	1	2	3	0	1	1	0.990631
29	9	759.367	870.1	1100.57	0	0	0	0	0	0	1	0	1	859.92	960.591	1	0	1	1	3	4	0.973443
29	11	757.767	1145.97	980.133	0	0	0	0	0	0	0	0	0	928.708	1057.75	1	1	2	0	1	1	0.983301
29	13	834.033	809.933	997.2	0	0	0	0	0	0	1	0	1	838.8	835.917	0	0	0	0	1	1	1
29	15	921.967	1067.03	1004.03	0	0	0	0	1	1	1	1	2	786.591	942.792	1	3	4	0	1	1	0.99951
29	17	807.1	1066.5	1338.66	0	0	0	0	0	0	1	1	2	937.522	960.524	0	2	2	1	4	5	0.963321
29	19	798.6	1256.07	1360.96	0	0	0	1	2	3	0	3	3	1196.5	1433.48	2	1	3	1	4	5	0.946816
29	21	916.857	1354.96	1463.74	2	2	4	1	2	3	0	3	3	929.957	1417.06	1	2	3	0	8	8	0.890869
29	23	931.083	1261.04	1445.78	0	6	6	1	5	6	1	7	8	1275.71	1532.94	0	8	8	0	9	9	0.760918
29	25	979.636	1365.65	1537.25	0	8	8	0	4	4	2	10	12	1022.79	1101.32	1	6	7	1	6	7	0.795072
29	27	1085.33	1525	1667.07	2	3	5	0	6	6	2	16	18	1210.93	1412.36	4	11	15	2	11	13	0.709717
29	29	919.821	1481.24	1790.19	0	2	2	2	13	15	3	14	17	1471.86	1228.21	2	11	13	0	11	11	0.736502
29	31	986.85	1612.42	1527.69	4	10	14	2	11	13	2	14	16	1278.92	1083.47	1	12	13	2	10	12	0.7886
29	33	1531.42	1636.5	1616.05	2	11	13	2	22	24	6	11	17	1445.79	1266.78	0	11	11	1	7	8	0.837296
29	35	1256.8	1256.95	1439.06	1	15	16	3	9	12	2	12	14	1179.18	1354.82	0	8	8	0	8	8	0.760099
29	37	1226.59	1907.18	1667.29	3	13	16	3	13	16	1	13	14	1530.07	1363.11	1	11	12	0	7	7	0.815166
30	3	668.333	877.067	863.333	0	0	0	0	0	0	0	0	0	673.609	687.458	0	2	2	0	1	1	1
30	5	717.3	821.867	887.667	0	0	0	0	0	0	1	0	1	750.5	782.292	0	1	1	0	1	1	1
30	7	718.667	912.7	1019.17	0	0	0	0	0	0	0	1	1	785.042	907.87	0	1	1	0	2	2	1
30	9	863	928.767	905.867	0	0	0	0	0	0	0	0	0	910.087	829.048	0	2	2	0	4	4	1
30	11	767.3	953.9	1057.17	0	0	0	0	0	0	0	0	0	762.261	862.292	0	2	2	0	1	1	1
30	13	861.233	1032.83	996.9	0	0	0	0	0	0	1	0	1	889	869.391	0	2	2	0	2	2	1
30	15	985.167	1057.14	1056.45	0	0	0	0	1	1	0	1	1	704.917	876.25	0	1	1	0	1	1	1
30	17	943.107	1169.23	1151.13	0	2	2	0	0	0	0	0	0	1030.42	932.625	0	1	1	0	1	1	0.98133
30	19	1040.1	1378.63	1225.24	1	1	2	0	0	0	0	1	1	812.045	858.88	0	3	3	1	0	1	1
30	21	1002.97	1282.55	1304.13	0	0	0	1	1	2	0	0	0	1360.72	875.125	0	0	0	0	1	1	0.998364
30	23	987.607	1310.09	1382.5	2	2	4	1	7	8	1	6	7	765.55	871	0	5	5	0	3	3	0.977422
30	25	1078.47	1340.81	1316.55	0	0	0	1	3	4	0	1	1	1067.63	1012.71	0	6	6	1	1	2	0.991505
30	27	1177.67	1413.24	1219.36	1	0	1	0	1	1	0	2	2	1341.14	1104.46	0	3	3	0	1	1	1
30	29	987.233	1165.45	1287.2	0	0	0	0	1	1	0	5	5	873.609	1031.77	0	2	2	0	3	3	0.973565
30	31	1042.52	1180.46	1129.69	0	1	1	0	2	2	0	1	1	886.174	815.458	0	2	2	0	1	1	1
30	33	1041.23	1262.96	1188.96	1	4	5	0	5	5	1	5	6	1125.32	963.182	1	6	7	0	3	3	0.922685
30	35	1105	1232.37	1297.18	1	2	3	0	0	0	1	8	9	866.318	976.739	0	3	3	0	2	2	0.999061
30	37	1144.93	1230.41	1411.62	0	0	0	0	1	1	1	4	5	1082.68	1032.74	0	3	3	0	2	2	0.969904
